# Supplementary material
Source: PubMed Central journal article supplement (PMC6881802)
Supplement: AEM.01580-19-s0001.pdf [file AEM.01580-19-s0001.pdf]

1 **SUPPLEMENTARY MATERIAL**

2 Local adaptation of bacterial symbionts within a geographic mosaic of antibiotic  
3 coevolution

4

5 Eric J. Caldera<sup>1,\*</sup>, Marc G. Chevrette<sup>1,2,\*</sup>, Bradon R. McDonald<sup>1</sup>, Cameron R.  
6 Currie<sup>1,†</sup>

7

8 <sup>1</sup>Department of Bacteriology, University of Wisconsin-Madison, USA

9 <sup>2</sup>Department of Genetics, University of Wisconsin-Madison, USA

10

11 \*EJC & MGC, equal contributions

12 †CRC, corresponding author ([currie@bact.wisc.edu](mailto:currie@bact.wisc.edu))

13

| <b>Mutualist</b>      | <b>Parasite Target</b> | <b>Parasite Interaction</b> |
|-----------------------|------------------------|-----------------------------|
| Fungal Cultivar       | Primary                | Labile                      |
| Ant Host              | Secondary              | General                     |
| <i>Pseudonocardia</i> | Tertiary               | Specific                    |

14

15

16

17

**Supplementary Table 1:** Summary of microbial symbiont interactions associated with the fungus-farming ant *Apterostigma dentigerum*.

18

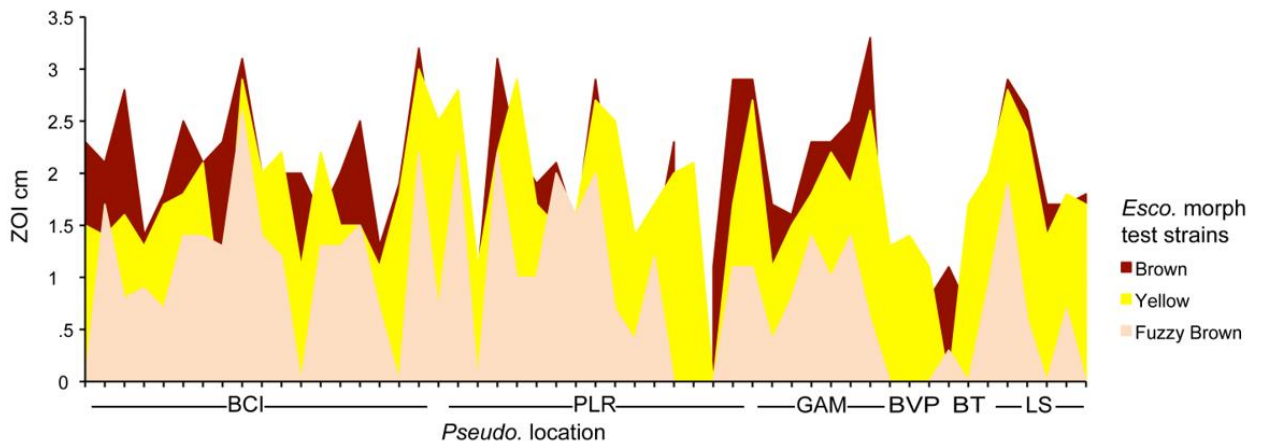

19  
20  
21  
22  
23  
24  
25

**Supplementary Figure 1:** Central America *Pseudonocardia* hierarchical inhibition of three parasite lineages (brown, yellow and fuzzy brown). Brown *Escovopsis* inhibition was greater than yellow, which was greater than fuzzy brown in paired t-tests. ZOI corresponds to the length of a zone of inhibition in Petri-plate bioassay experiments.

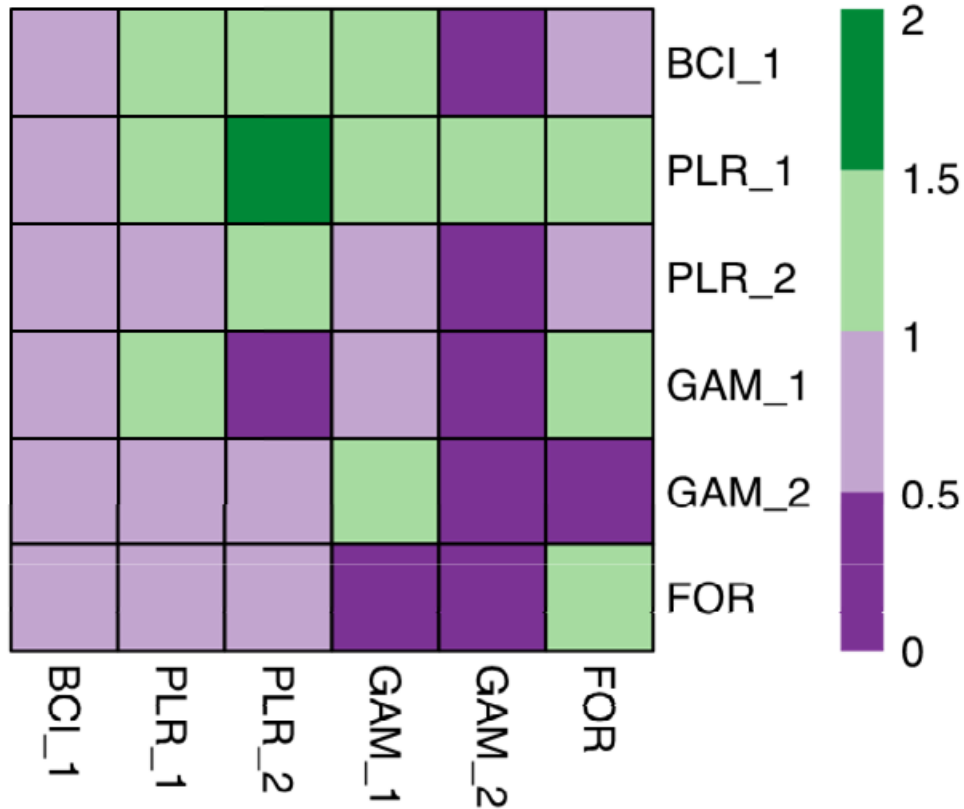

26  
 27 **Supplementary Figure 2:** Trait mismatches in *Pseudonocardia-Escovopsis*  
 28 inhibition across Panama. A lack of differentiation is seen between within-colony  
 29 (i.e., along the diagonal) and among-colony interactions refutes colony-level  
 30 symbiont selection. In contrast, cultivars have little antibiotic inhibition towards  
 31 brown *Escovopsis* (see Gerardo, N.M. & E.J. Caldera. 2007. Labile associations  
 32 between fungus-growing ant cultivars and their garden pathogens. *International*  
 33 *Society for Microbial Ecology Journal*. 1: 373-384). Darker shades indicate a  
 34 greater zone of inhibition (ZOI) against *Escovopsis* in Petri plate bioassays.  
 35

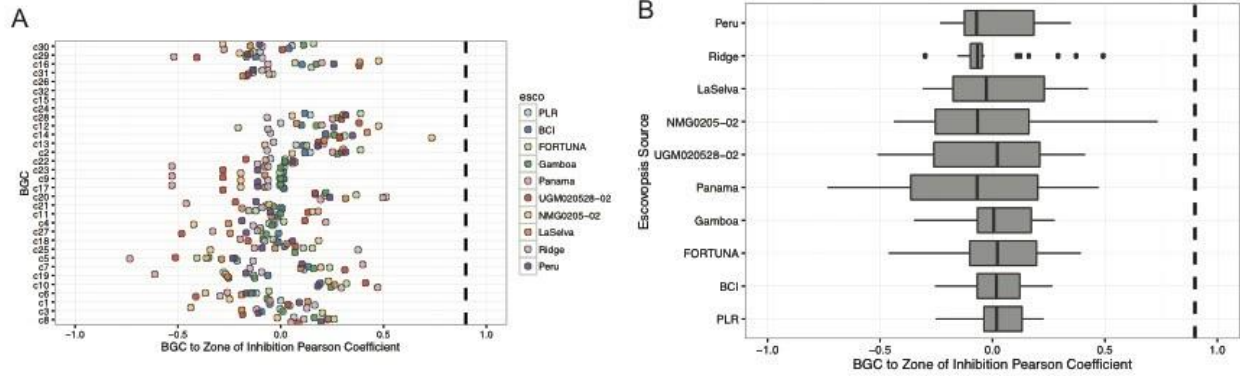

37  
38  
39  
40  
41  
42

**Supplementary Figure 3:** Pearson correlations between the presence/absence of a biosynthetic gene cluster and the observed *Escovopsis* zone of inhibition by *Pseudonocardia*. Groupings based on either BGC (a) or *Escovopsis* source (b) do not reach significance.

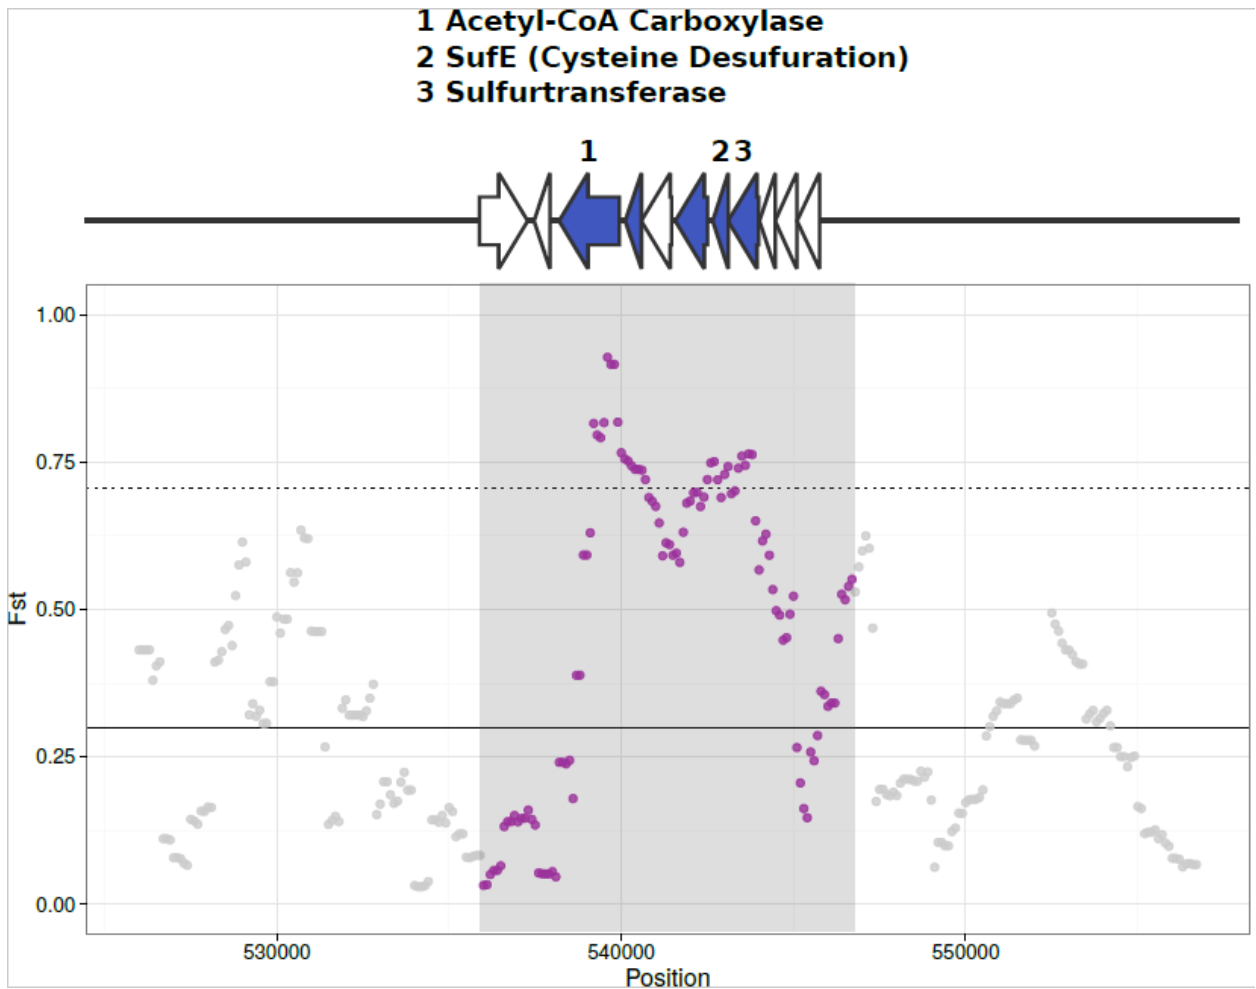

43  
 44  
 45  
 46

**Supplementary Figure 4:** High  $F_{ST}$  within three enzymatic bacteriocin regions in a population of *Pseudocardia* symbionts on Barro Colorado Island, Panama.

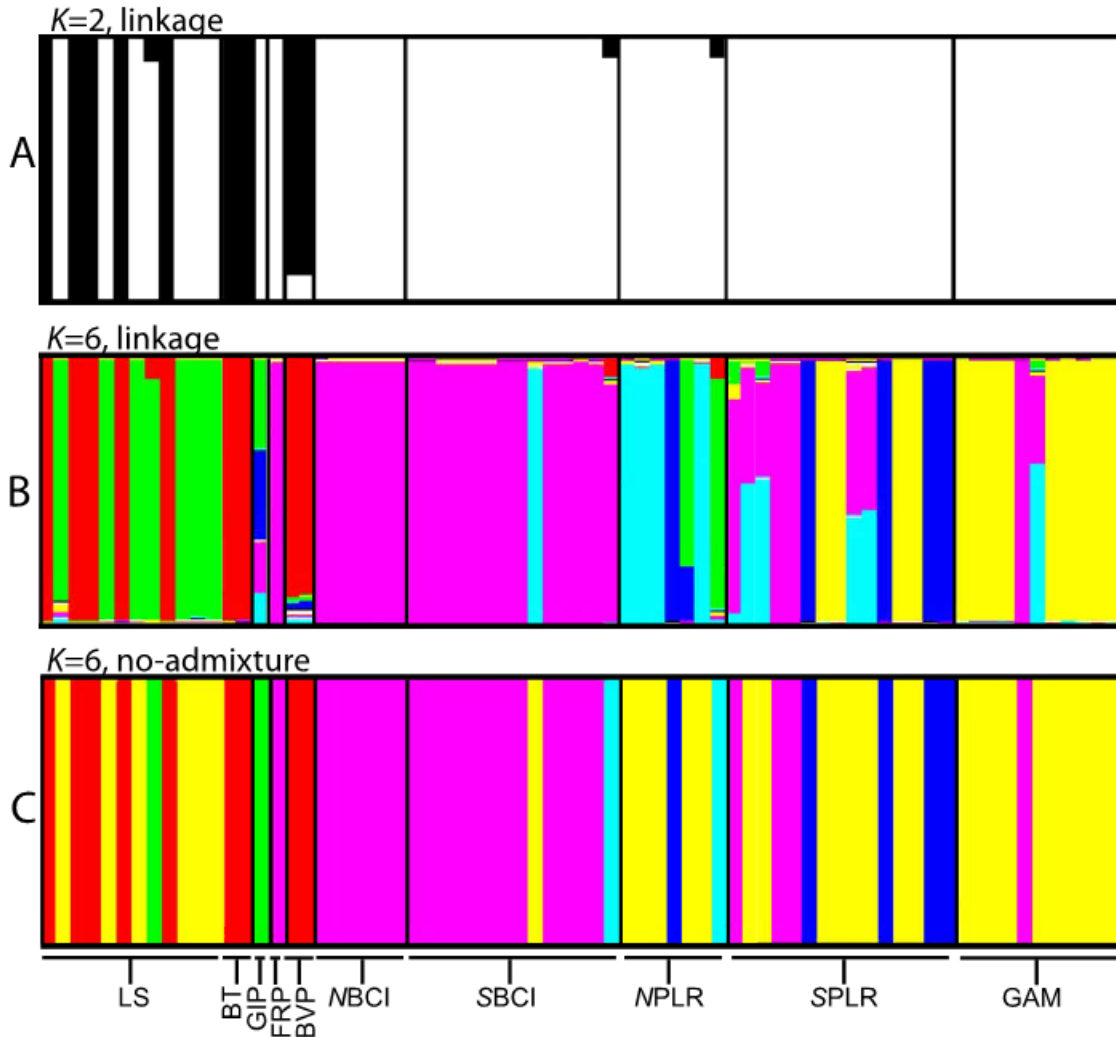

47  
 48 **Supplementary Figure 5:** Assignment of *Pseudonocardia* isolates to genetic  
 49 clusters (K) determined using Bayesian simulations in STRUCTURE. Each vertical  
 50 line corresponds to the proportion of an individual's genome that corresponds to a  
 51 particular cluster, indicated by color differences. Panel A presents results of the  
 52 linkage/admixture model (K=2), as determined by calculating  $\Delta K$  (see see Evanno  
 53 G, Regnaut S, Goudet J. 2005. Detecting the number of clusters of individuals  
 54 using the software STRUCTURE: a simulation study. Mol Ecol 14:2611–20).  
 55 Admixed isolates in A correspond to recombinant sequences identified through  
 56 tests for recombination and phylogenetic incongruence (see Caldera EJ, Currie  
 57 CR. 2012. The Population Structure of Antibiotic-Producing Bacterial Symbionts of  
 58 *Apterostigma dentigerum* Ants: Impacts of Coevolution and Multipartite Symbiosis.  
 59 Am Nat 180:604–617). B and C show K=6 for the linkage/admixture and no-  
 60 admixture models, respectively, where the no-admixture model assumes that each  
 61 isolate derives from a single population and the linkage/admixture model allows  
 62 individuals to have admixed ancestry. K=2 yielded the highest  $\Delta K$  values (see  
 63 Evanno G, Regnaut S, Goudet J. 2005. Detecting the number of clusters of  
 64 individuals using the software STRUCTURE: a simulation study. Mol Ecol  
 65 14:2611–20) for both the linkage (A) and no-admixture (not shown) models. Output

66 for both of these models was virtually identical with the exception of admixture in  
67 five isolates. These two populations corresponded to the two major clades  
68 observed by phylogenetic analysis. As stated in the STRUCTURE documentation,  
69 selecting the appropriate K can be difficult when populations conform to isolation  
70 by distance (see Caldera EJ, Currie CR. 2012. The Population Structure of  
71 Antibiotic-Producing Bacterial Symbionts of *Apterostigma dentigerum* Ants:  
72 Impacts of Coevolution and Multipartite Symbiosis. Am Nat 180:604–617). The  
73 highest likelihood scores for the linkage model were observed for K=6 (B). For both  
74 the linkage and no-admixture models, Ks larger than six did not find additional  
75 structure or assign individuals to different populations, but rather only added  
76 minimal probability of association to multiple populations for a few isolates. Thus,  
77 we also present K=6 for the no-admixture model (C), as it is most consistent with  
78 the Evanno et al. 2005 method (see Evanno G, Regnaut S, Goudet J. 2005.  
79 Detecting the number of clusters of individuals using the software STRUCTURE:  
80 a simulation study. Mol Ecol 14:2611–20) of selecting K. Similar population  
81 clusters were identified for both models; however, the linkage model captured a  
82 greater distinction between LS, Costa Rica and the Panamanian isolates, and  
83 identified a genetic cluster within NPLR that appears admixed with SPLR and  
84 GAM. The linkage model identified the sole isolate from GIP as being highly  
85 admixed.  
86



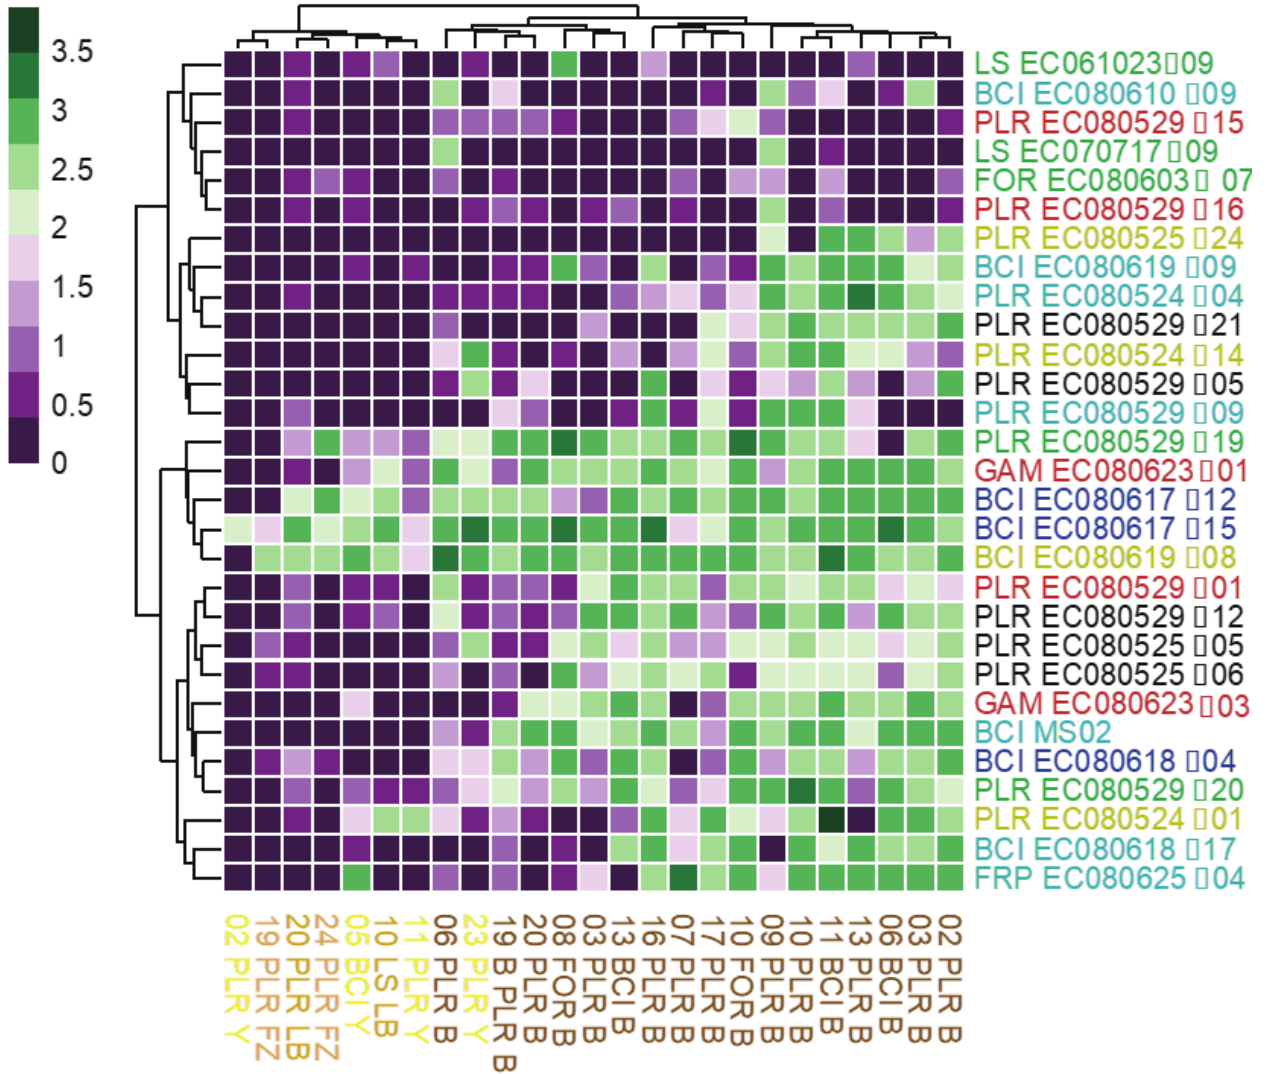

87  
88  
89  
90  
91  
92  
93

**Supplementary Figure 6:** Zones of inhibition in various *Escovopsis*-*Pseudonocardia* challenges clustered based on Euclidean distance. Large zones shown in dark green and no inhibition shown in dark purple. *Pseudonocardia* (y-axis) are color coded by fineSTRUCTURE groupings from whole genome sequencing, and *Escovopsis* (x-axis) are color coded by morphotype.
